# Supplementary material for: Screening, Synthesis, and QSAR Research on Cinnamaldehyde-Amino Acid Schiff Base Compounds as Antibacterial Agents
Source: MDPI journal article supplement (doi:10.3390/molecules23113027), 2018-11-20
Supplement: s1 [file s1]

# Supplementary Information

Article

## Screening, Synthesis, and QSAR Research on Cinnamaldehyde-Amino Acid Schiff Base Compounds as Antibacterial Agents

Hui Wang <sup>1,2</sup>, Mingyue Jiang <sup>2</sup>, Fangli Sun <sup>1,\*</sup>, Shujun Li <sup>2,\*</sup>, Chung-Yun Hse <sup>3</sup> and Chunde Jin <sup>1</sup>

<sup>1</sup> School of Engineering, Zhejiang A&F University, Lin'an 311300, China; wh-snowis@outlook.com (H.W.); jincd@zafu.edu.cn (C.J.)

<sup>2</sup> Key Laboratory of Bio-Based Material Science and Technology of the Ministry of Education, Northeast Forestry University, Harbin 150040, China; jiangmingyue@nefu.edu.cn

<sup>3</sup> Southern Research Station, USDA Forest Service, Pineville, LA 71360, USA; chse@fs.fed.us

\* Correspondence: sun-fangli@163.com (F.S.); lishujun@nefu.edu.cn (S.L.);

Tel.: +86-137-3813-1516 (F.S.); +86-451-8219-1742 (S.L.)

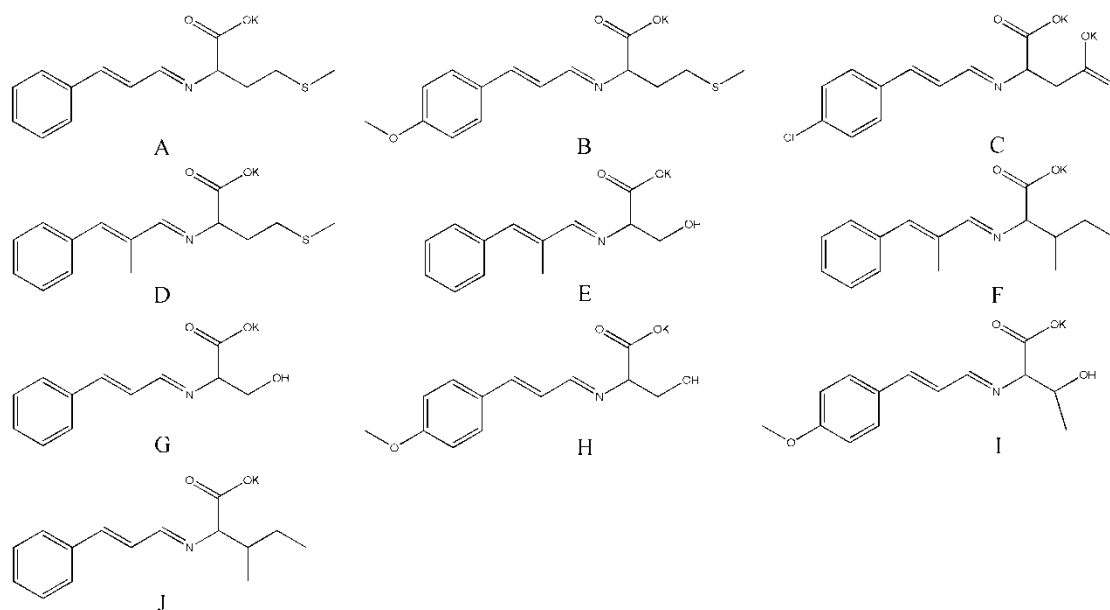

**Figure S1.** The designed compounds using best QSAR models

**Table S1.** The calculated lgAR of screened compounds according to the best QSAR models

| No. | Cal. lgAR against <i>E.coli</i> | Cal.lgAR against <i>S.aureus</i> |
|-----|---------------------------------|----------------------------------|
| A   | 1.8831                          | 1.8365                           |
| B   | 1.9323                          | 2.0876                           |
| C   | 2.1099                          | 2.3131                           |
| D   | 1.8545                          | 1.9806                           |
| E   | 1.8501                          | 0.8467                           |
| F   | 1.8626                          | 1.9770                           |
| G   | 1.9012                          | 0.8149                           |
| H   | 1.8226                          | 1.1254                           |
| I   | 2.0131                          | 1.9275                           |
| J   | 1.8697                          | 1.8426                           |
